# Supplementary material for: (Per)Chlorate-Reducing Bacteria Can Utilize Aerobic and Anaerobic Pathways of Aromatic Degradation with (Per)Chlorate as an Electron Acceptor
Source: PubMed Central journal article supplement — mBio. 2015 Mar 24;6(2):e02287-14. doi: 10.1128/mBio.02287-14 (PMC4453571; doi:10.1128/mbio.02287-14), 2015-03-24
Supplement: mbo002152241st1.pdf [file mbo002152241st1.pdf]

| <b>Gene</b>        | <b>CUZ Locus Tags</b> | <b>NSS Locus Tags</b> |
|--------------------|-----------------------|-----------------------|
| <b>Paa Cluster</b> |                       |                       |
| <i>paaE</i>        | CUZ_04215             | NSS_00036170          |
| <i>paaZ</i>        | CUZ_04217             | NSS_00036190          |
| <i>paaF</i>        | CUZ_04218             | NSS_00036200          |
| <i>paaG</i>        | CUZ_04219             | NSS_00036210          |
| <i>paaH</i>        | CUZ_04220             | NSS_00036220          |
| <i>paaJ</i>        | CUZ_04221             | NSS_00036230          |
| <i>paaK</i>        | CUZ_04222             | NSS_00036090          |
| <b>Pad Cluster</b> |                       |                       |
| <i>padB</i>        | CUZ_03788             | NSS_00026680          |
| <i>padC</i>        | CUZ_03789             | NSS_00026690          |
| <i>padD</i>        | CUZ_03790             | NSS_00026700          |
| <i>padE</i>        | CUZ_03791             | NSS_00026710          |
| <i>padF</i>        | CUZ_03792             | NSS_00026720          |
| <i>padG</i>        | CUZ_03793             | NSS_00026730          |
| <i>padH</i>        | CUZ_03794             | NSS_00026740          |
| <i>padI</i>        | CUZ_03795             | NSS_00026750          |
| <i>padJ</i>        | CUZ_03796             | NSS_00026760          |
| <b>Bcr Cluster</b> |                       |                       |
| <i>bcrD</i>        | CUZ_03342             | NSS_00026570          |
| <i>bcrA</i>        | CUZ_03343             | NSS_00026580          |
| <i>bcrB</i>        | CUZ_03344             | NSS_00026590          |
| <i>bcrC</i>        | CUZ_03345             | NSS_00026600          |
| <i>dch</i>         | CUZ_03346             | NSS_00026610          |
| <i>oah</i>         | CUZ_03347             | NSS_00026620          |
| <i>had</i>         | CUZ_03348             | NSS_00026630          |
| <b>Box Cluster</b> |                       |                       |
| <i>boxB</i>        | CUZ_03988             | NSS_00004810          |
| <i>boxC</i>        | CUZ_03987             | NSS_00004800          |

Table S1. Locus tags for genes in the *paa*, *pad*, *brc*, and *box* clusters of strains CUZ and NSS.
