# Supplementary figures and images for: (Per)Chlorate-Reducing Bacteria Can Utilize Aerobic and Anaerobic Pathways of Aromatic Degradation with (Per)Chlorate as an Electron Acceptor
Source: PubMed Central journal article supplement — mBio. 2015 Mar 24;6(2):e02287-14. doi: 10.1128/mBio.02287-14 (PMC4453571; doi:10.1128/mbio.02287-14), 2015-03-24

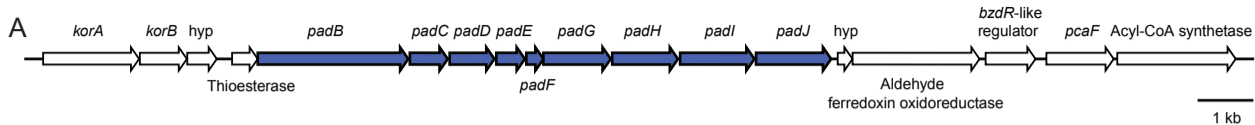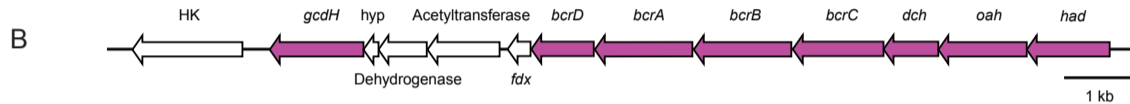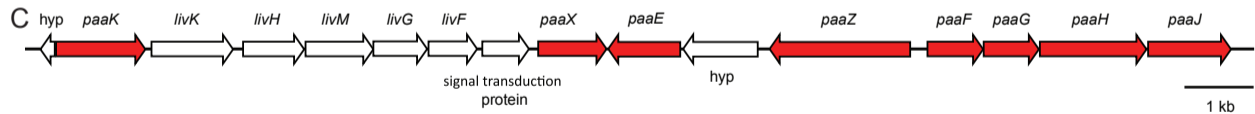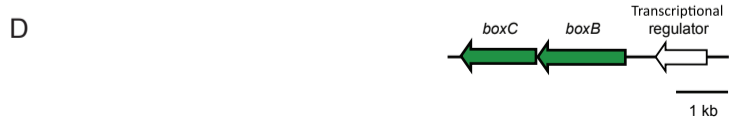

Supplement: mbo002152241sf1.pdf [file mbo002152241sf1.pdf]

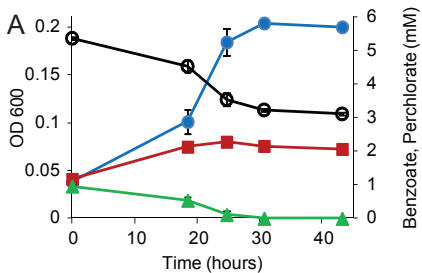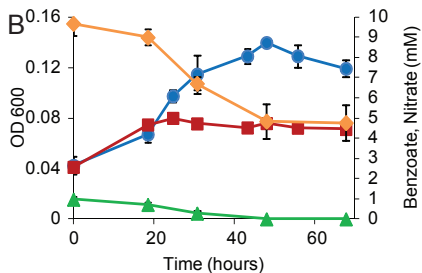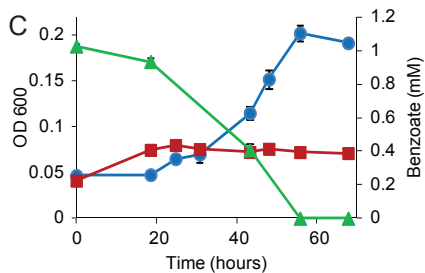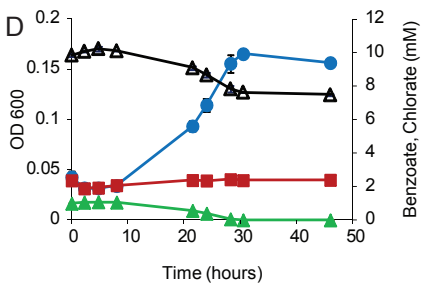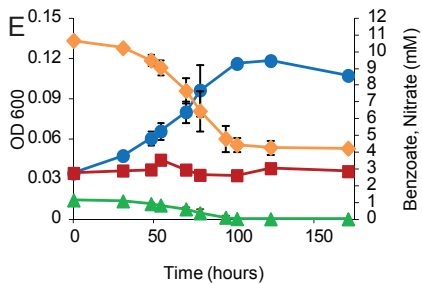

Supplement: mbo002152241sf2.pdf [file mbo002152241sf2.pdf]

A

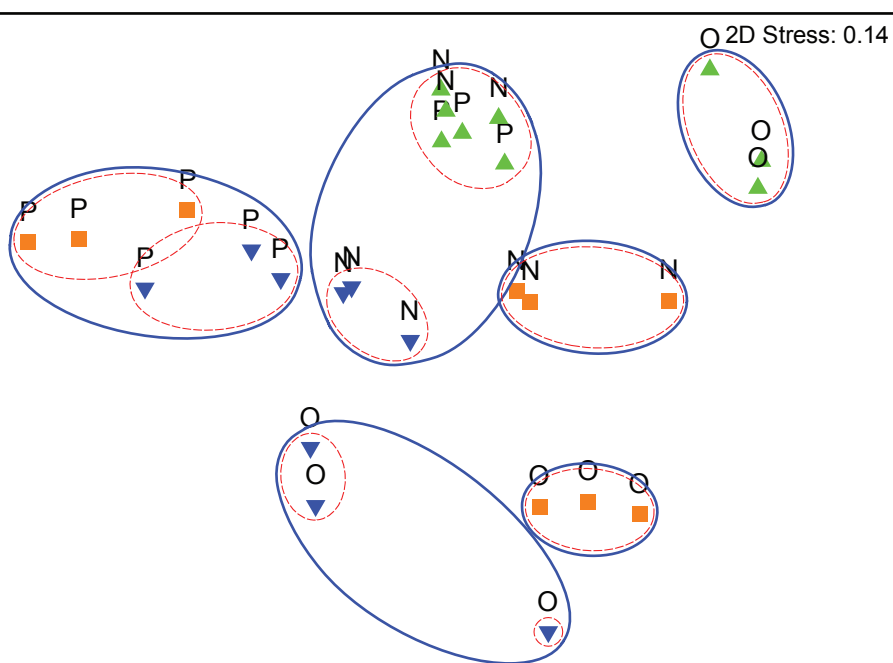

B

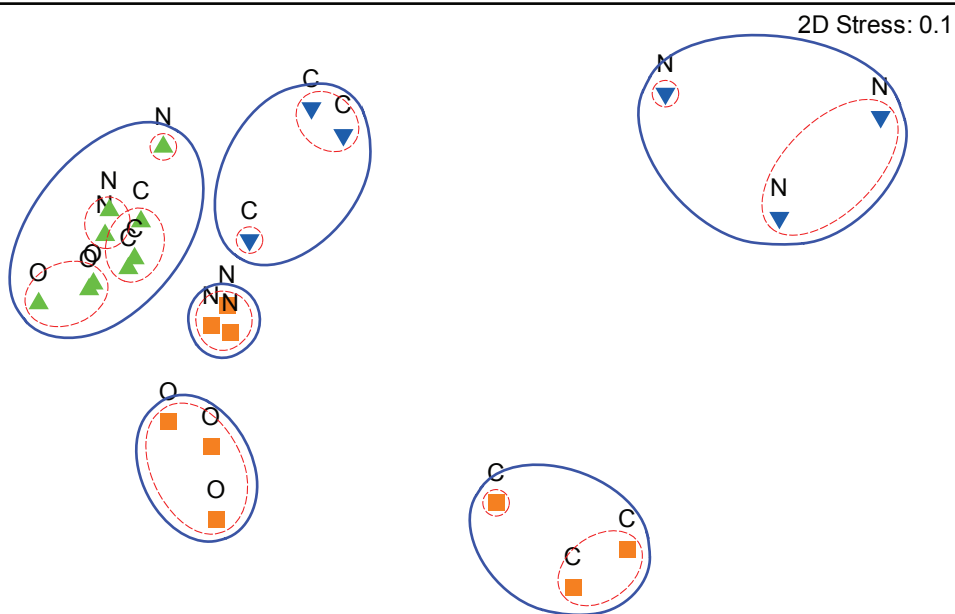

Supplement: mbo002152241sf3.pdf [file mbo002152241sf3.pdf]
